# Supplementary material
Source: PubMed Central journal article supplement (PMC7710923)
Supplement: NIHMS1623209-supplement-2.pdf [file NIHMS1623209-supplement-2.pdf]

**Table S1. Patient summaries.** Summary from all evaluable patients treated on study.

| CyTOF? | Patient | Dose  |       | Gender | Age | Diagnosis | Pre-Treatment<br>BM Blast (%) | No. Prior<br>Therapies | Best<br>Response | LFS<br>(days) | OS<br>(days) |
|--------|---------|-------|-------|--------|-----|-----------|-------------------------------|------------------------|------------------|---------------|--------------|
|        |         | Level | Level |        |     |           |                               |                        |                  |               |              |
| No     | 001     | 1     | 1     | Male   | 73  | AML       | 16                            | 2                      | PD               | 14            | 33           |
| No     | 006     | 1     | 1     | Male   | 70  | AML       | 28                            | 3                      | PD               | 14            | 60           |
| No     | 007     | 1     | 1     | Male   | 77  | AML       | 47                            | 1                      | CR               | 181           | 256          |
| No     | 008     | 2     | 2     | Male   | 76  | t-AML     | 17                            | 3                      | PD               | 28            | 75           |
| No     | 009     | 2     | 2     | Female | 73  | AML       | 80                            | 3                      | MLFS             | 30            | 198          |
| No     | 012     | 2     | 2     | Female | 71  | AML       | 15                            | 3                      | CR               | 104           | 338          |
| Yes    | 016     | 3     | 3     | Male   | 43  | AML       | 78                            | 7                      | PD               | 14            | 27           |
| Yes    | 017     | 3     | 3     | Male   | 63  | t-AML     | 69                            | 4                      | MLFS             | 31            | 43           |
| Yes    | 020     | 3     | 3     | Male   | 60  | AML       | 13                            | 1                      | CRi              | 77            | 77           |
| Yes    | 022     | 3     | 3     | Female | 71  | AML       | 90                            | 1                      | PD               | 14            | 19           |
| Yes    | 023     | 3     | 3     | Male   | 83  | AML       | 86                            | 1                      | CRi              | 49            | 162          |
| Yes    | 024     | 3     | 3     | Male   | 73  | AML       | 0                             | 2                      | MLFS             | 29            | 29           |
| Yes    | 025     | 2     | 2     | Male   | 72  | t-AML     | 2                             | 1                      | CR               | 92*           | 1260+        |
| Yes    | 027     | 3     | 3     | Male   | 76  | AML       | 1                             | 2                      | CRi              | 267           | 1170+        |
| Yes    | 028     | 3     | 3     | Female | 69  | MDS       | 5                             | 1                      | CRi              | 91            | 390          |

BM, bone marrow; AML, acute myeloid leukemia; t-AML, treatment-related AML; MDS, myelodysplastic syndrome; PD, progressive disease; CR, complete response; MLFS, morphologic leukemia free state on day 14; CRi, CR with incomplete count recovery; LFS, Leukemia-free survival; OS, overall survival. \*Leukemia-free survival censored at time of stem cell transplant. For CIML026, see methods. Dose level 1: 0.5x10<sup>6</sup>/kg, 2: 1x10<sup>6</sup>/kg, 3: 2-10x10<sup>6</sup>/kg.

**Table S2. Toxicities considered possibly or probably related to ML NK cell infusion, Grade  $\geq$  2 (n= 15).**  
 All adverse events were treatment emergent and graded according to the Common Terminology Criteria for Adverse events (CTCAE), v4.

| <b>Toxicity</b>     | <b>Grade 2</b> | <b>Grade 3</b> | <b>Grade 4</b> |
|---------------------|----------------|----------------|----------------|
| Increased bilirubin | 1              |                |                |
| Sinus tachycardia   | 1              |                |                |
| Hypoxia             | 1              |                |                |
| Dyspnea             | 1              |                |                |
| Confusion           | 1              |                |                |
| Lethargy            | 1              |                |                |
| Chills              | 1              |                |                |
| Anorexia            | 1              |                |                |
| Fatigue             | 1              |                |                |
| Alopecia            | 1              |                |                |

**Table S3. All toxicities  $\geq$  grade 3, regardless of attribution, excepting cytopenias and correctable electrolyte abnormalities (n= 15). All adverse events were treatment emergent and graded according to the CTCAE, v4.**

| <b>Toxicity</b>              | <b>Grade 3</b> | <b>Grade 4</b> | <b>Grade 5</b> |
|------------------------------|----------------|----------------|----------------|
| Febrile neutropenia          | 13             |                |                |
| Bacteremia                   | 3              |                |                |
| Candidemia                   | 1              |                |                |
| Sepsis                       |                | 4              |                |
| Skin infection               | 5              |                |                |
| Urinary tract infection      | 1              |                |                |
| Lung infection               | 1              |                |                |
| Increased bilirubin          | 1              |                |                |
| Increase liver enzymes       | 2              | 2              |                |
| Hyperglycemia                | 3              |                |                |
| Hypoalbuminemia              | 2              |                |                |
| Acidosis                     |                | 1              |                |
| Prolonged PTT                | 1              |                |                |
| Troponin increased           | 1              |                |                |
| Intracranial hemorrhage      |                | 1              |                |
| Other bleeding               | 4              | 1              |                |
| Respiratory failure          |                | 4              |                |
| Hypoxia                      | 3              |                |                |
| Shortness of breath          | 1              |                |                |
| Pulmonary edema              | 1              |                |                |
| Cardiopulmonary arrest       |                |                | 1              |
| Hypotension                  | 4              | 1              |                |
| Hypertension                 | 3              |                |                |
| Atrial fibrillation          | 2              |                |                |
| Supraventricular tachycardia | 1              |                |                |
| Generalized weakness         | 2              |                |                |
| Headache                     | 1              |                |                |
| Acute kidney injury          | 1              |                |                |
| Mucositis                    |                | 1              |                |
| Nausea                       | 2              |                |                |
| Edema                        | 2              |                |                |
| Multi-organ failure          |                |                | 1              |
| Anorexia                     | 1              |                |                |
| Pain in extremity            | 1              |                |                |
| Encephalopathy               |                |                | 1              |

**Table S4. NK cell phenotypic, functional and mass cytometry panels.** The metal isotope tag, marker name, antibody clone, source and clustering usage are shown for the mass cytometry phenotypic (P), functional (F), or resistance (R) panels. Clustering demarcates which channels were used for generating the NK cell viSNE plots, and identifying lymphocyte subsets (FlowSOM) in the phenotypic panel (Lymph) or the resistance (Resist) panel. The asterisk (\*) included after the source indicates antibodies that were custom-conjugated using Fluidigm antibody labeling kits, per manufacturer's instructions. NA, not applicable.

| Tag    | Antibody     | Clone   | Source           | Panel | Clustering        |
|--------|--------------|---------|------------------|-------|-------------------|
| 89 Y   | CD45         | HI30    | Fluidigm         | P/F/R | Lymph, Resist     |
| 141 Pr | CD14         | M5E2    | BD Pharmingen*   | P/F/R | Lymph, Resist     |
| 142 Nd | CD19         | HIB19   | Fluidigm         | P/F   | Lymph             |
| 143 Nd | KIR3DL1      | DX9     | R&D*             | P/F   | NK                |
| 143 Nd | CD117        | 104D2   | Biolegend*       | R     | Resist            |
| 144 Nd | FITC         | FIT-22  | Fluidigm         | P/F   | NA                |
| 144 Nd | CD19         | HIB19   | Biolegend*       | R     | Resist            |
| 145 Nd | KIR2DS4      | FES172  | Beckman Coulter* | P/F   | NK                |
| 145 Nd | HLA-E        | 3D12    | Biolegend*       | R     | NA                |
| 146 Nd | KIR2DL1/2DS1 | EB6B    | Beckman Coulter* | P/F   | NK                |
| 147 Sm | NKG2D        | 1D11    | R&D*             | P/F   | NK                |
| 147 Sm | CD15         | W6D3    | Biolegend*       | R     | Resist            |
| 148 Nd | KIR2DL2/2DL3 | CH-L    | BD Pharmingen*   | P/F/R | NK, Resist        |
| 148 Nd | KIR2DL1      | EB6B    | Beckman Coulter* | R     | Resist            |
| 148 Nd | KIR3DL1      | X27     | Beckman Coulter* | R     | Resist            |
| 149 Sm | CD127        | AO19D5  | Fluidigm         | P/R   | Lymph, Resist     |
| 149 Sm | T-Bet        | 4B10    | BD Pharmingen*   | F     | NA                |
| 150 Nd | CD4          | OKT4    | Miltenyi*        | P/R   | Lymph, Resist     |
| 150 Nd | Mip1a        | 93342   | R&D*             | F     | NA                |
| 151 Eu | TRAIL        | RIK-2   | Biolegend*       | P     | NK                |
| 151 Eu | CD107a       | H4A3    | Fluidigm         | F     | NA                |
| 152 Sm | CD8          | SK1     | eBioscience*     | P/R   | Lymph, Resist     |
| 152 Sm | TNF          | Mab11   | Fluidigm         | F     | NA                |
| 153 Eu | CD62L        | DREG-56 | Fluidigm         | P/F   | NK                |
| 154 Sm | KIR2DL5      | UP-R1   | Beckman Coulter* | P/F   | NK                |
| 155 Gd | CD27         | L128    | Fluidigm         | P/F   | NK                |
| 156 Gd | PDL1/PDL2    | 29E.2A3 | Fluidigm         | P     | NA                |
| 158 Gd | CD137        | 4B4-1   | Fluidigm         | P/F   | NK                |
| 159 Tb | NKG2C        | 134591  | R&D*             | P/F   | NK                |
| 160 Gd | CD69         | FN50    | Biolegend*       | P/F   | NK                |
| 161 Dy | NKp30        | P30-15  | Biolegend*       | P/F   | NK                |
| 162 Dy | KI-67        | B56     | Fluidigm         | P     | NK                |
| 162 Dy | LAG3         | 11C3C65 | Biolegend*       | F     | NA                |
| 162 Dy | FoxP3        | PCH101  | Fluidigm         | R     | Resist            |
| 163 Dy | CD94         | DX22    | Biolegend*       | P/F   | NK                |
| 163 Er | CD33         | WM53    | Fluidigm         | R     | Resist            |
| 164 Dy | FoxP3        | PCH101  | Invitrogen*      | P     | NA                |
| 164 Dy | Tim-3        | F38-2E2 | Biolegend*       | F     | NA                |
| 165 Ho | CD16         | 3G8     | Fluidigm         | P/F/R | Lymph, NK, Resist |

|        |               |          |                  |       |                      |
|--------|---------------|----------|------------------|-------|----------------------|
| 166 Er | NKG2A         | ZI99     | Beckman Coulter* | P/F/R | NK                   |
| 167 Er | NKp44         | P44-8    | Biolegend*       | P/F   | NK                   |
| 168 Er | DNAM1         | DX11     | Miltenyi*        | P     | NK                   |
| 168 Er | IFN- $\gamma$ | B27      | Fluidigm         | F     | NA                   |
| 169 Tm | CD25          | 2A3      | Fluidigm         | P/R   | Lymph, NK,<br>Resist |
| 169 Tm | Eomes         | WD1928   | Invitrogen*      | F     | NA                   |
| 170 Er | CD34          | 581      | Invitrogen*      | P/F/R | Lymph, Resist        |
| 171 Yb | Granzyme B    | GB11     | Fluidigm         | P     | NK                   |
| 171 Yb | PD-1          | EbioJ105 | Invitrogen*      | F     | NA                   |
| 172 Yb | CD57          | HCD57    | Fluidigm         | P/F   | NK                   |
| 173 Yb | CD3           | UCHT1    | BD Pharmingen*   | P/F/R | Lymph, Resist        |
| 174 Yb | NKp46         | 9E2      | R&D*             | P/F   | NK                   |
| 174 Yb | HLA-DR        | L243     | Fluidigm         | R     | Resist               |
| 175 Lu | Perforin      | B-D48    | Fluidigm         | P/F   | NK                   |
| 176 Yb | CD56          | NCAM16.2 | Fluidigm         | P/F/R | Lymph, NK,<br>Resist |
| 209 Bi | CD11b         | 209Bi    | Fluidigm         | P/F/R | Lymph, NK,<br>Resist |
